# Supplementary material for: Detection of Senecionine in Dietary Sources by Single-Use Electrochemical Sensor
Source: MDPI journal article supplement (doi:10.3390/mi12121585), 2021-12-20
Supplement: s1 [file s1]

## Supplementary Materials

### Detection of Senecionine in Dietary Sources by Single-Use Electrochemical Sensor

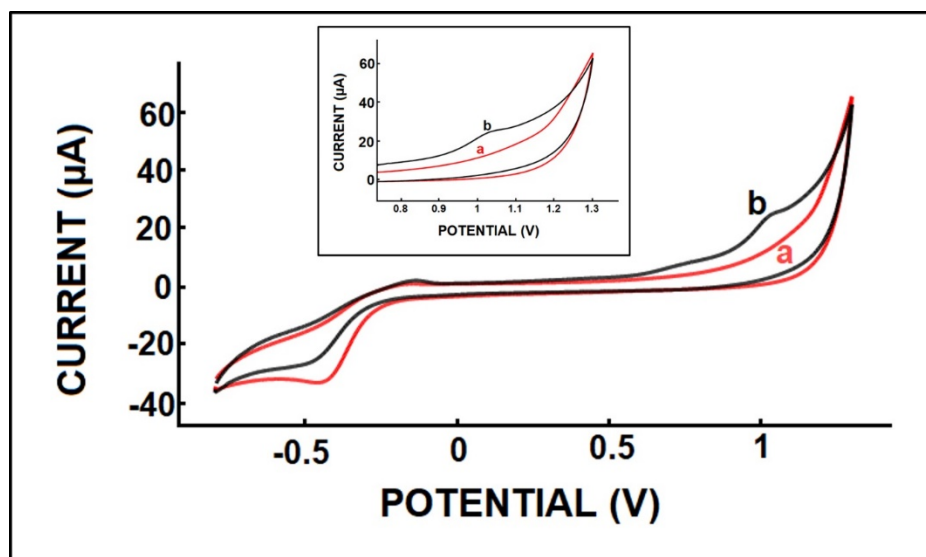

**Fig S1.** CVs recorded by PGE in (a) PBS in the absence of SEN, (b) 10  $\mu\text{g/mL}$  SEN solution. The inset shows a blow-up of the oxidation signal of SEN.

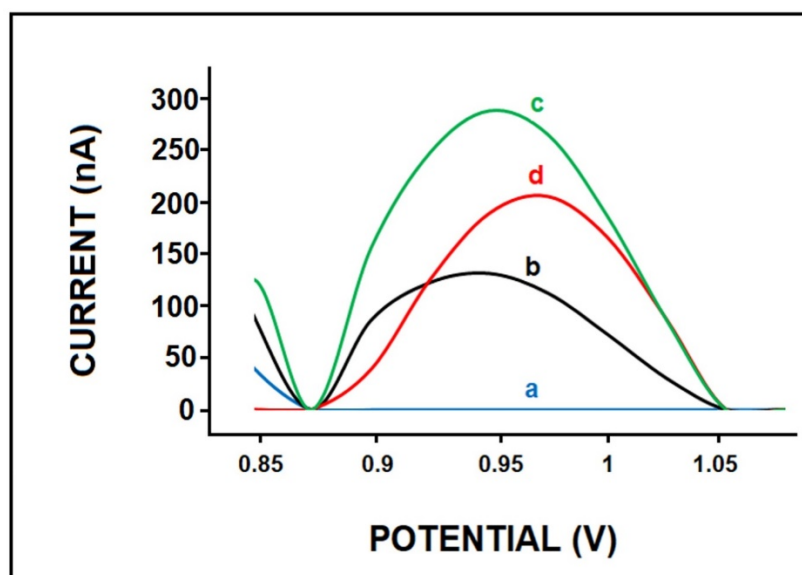

**Figure S2.** Voltammograms representing (a) the control experiment performed by PGE in PBS in the absence of SEN, the oxidation signal of 50  $\mu\text{g/mL}$  SEN after immobilization onto the PGE surface during (b) 15 min, (c) 30 min, (d) 60 min.

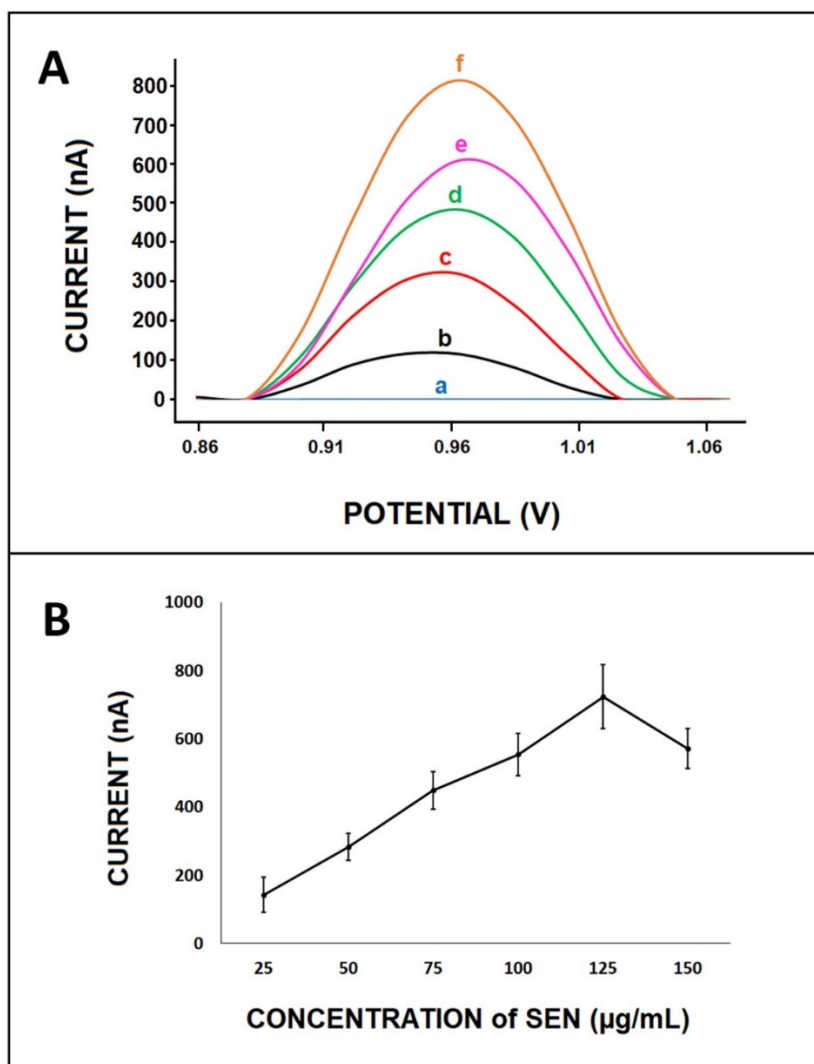

**Figure S3.** (A) Voltammograms representing the oxidation signal of SEN (its stock solution was prepared in DMSO) in the concentration range of 25–125 µg/mL; (a) 0, (b) 25, (c) 50, (d) 75, (e) 100, (f) 125 µg/mL SEN. (B) Line graph representing the average oxidation signal of SEN (n=3) in the concentration range of SEN from 25 to 200 µg/mL.

**Table S1.** The average oxidation signals of SEN (n=3) measured in the range of 0 – 125 µg/mL prepared in different medium.

| Concentration of SEN (µg/mL) | Stock Solution in DMSO | Stock Solution in Methanol |
|------------------------------|------------------------|----------------------------|
|                              | Current (nA)           | Current (nA)               |
| 25                           | 142.67 ± 52.31         | 197.80 ± 24.64             |
| 50                           | 282.80 ± 40.20         | 377.67 ± 43.15             |
| 75                           | 448.67 ± 54.50         | 553.00 ± 102.24            |
| 100                          | 554.67 ± 62.01         | 690.60 ± 107.97            |
| 125                          | 723.33 ± 94.08         | 856.00 ± 124.93            |

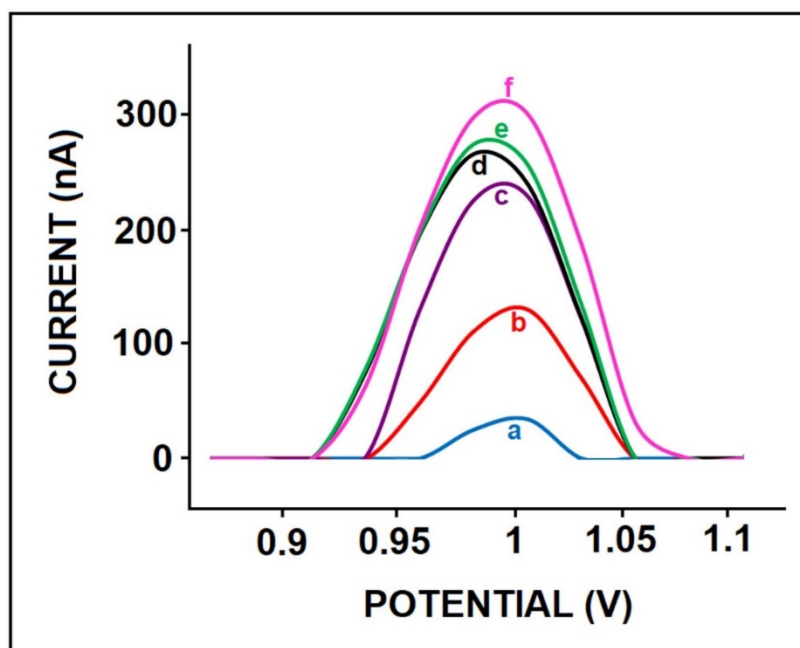

**Fig S4.** Voltammograms representing the oxidation signal of SEN prepared in 0.5 % sample of flour (a) in the absence of SEN (control experiment) and in the presence of (b) 50  $\mu\text{g/mL}$ , (c) 100  $\mu\text{g/mL}$ , (d) 150  $\mu\text{g/mL}$ , (e) 200  $\mu\text{g/mL}$ , (f) 250  $\mu\text{g/mL}$  SEN in 0.5 % flour sample.

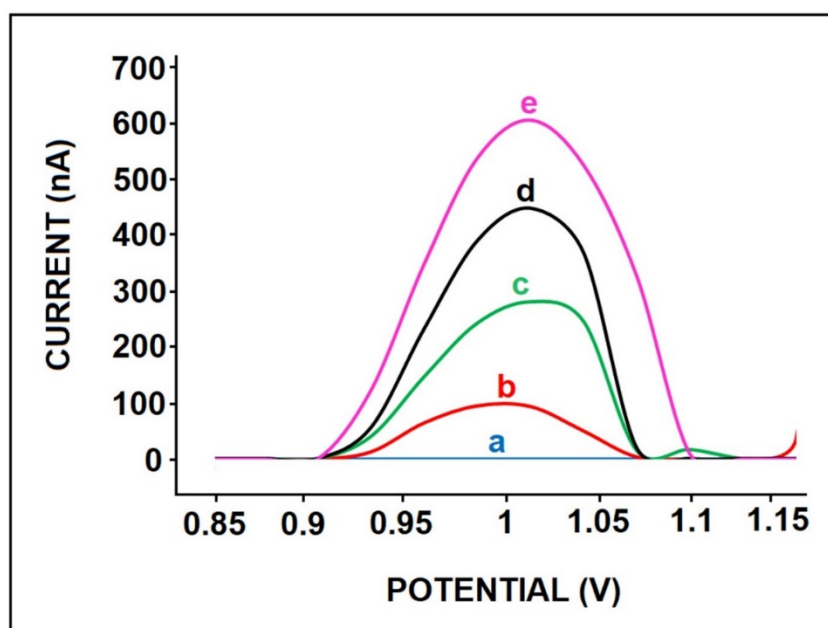

**Fig S5.** Voltammograms representing the oxidation signal of SEN prepared in 1:100 diluted sample of linden tea (a) in the absence of SEN (control experiment) and in the presence of (b) 50  $\mu\text{g/mL}$ , (c) 100  $\mu\text{g/mL}$ , (d) 150  $\mu\text{g/mL}$ , (e) 200  $\mu\text{g/mL}$  SEN in 1:100 diluted sample of linden tea.
